# Supplementary material for: Corticostriatal White Matter Integrity and Dopamine D1 Receptor Availability Predict Age Differences in Prefrontal Value Signaling during Reward Learning
Source: PubMed Central journal article supplement (PMC7472214; doi:10.1093/cercor/bhaa104), 2020-06-02
Supplement: suppfig1_bhaa104.pdf [file suppfig1_bhaa104.pdf]

vmPFC

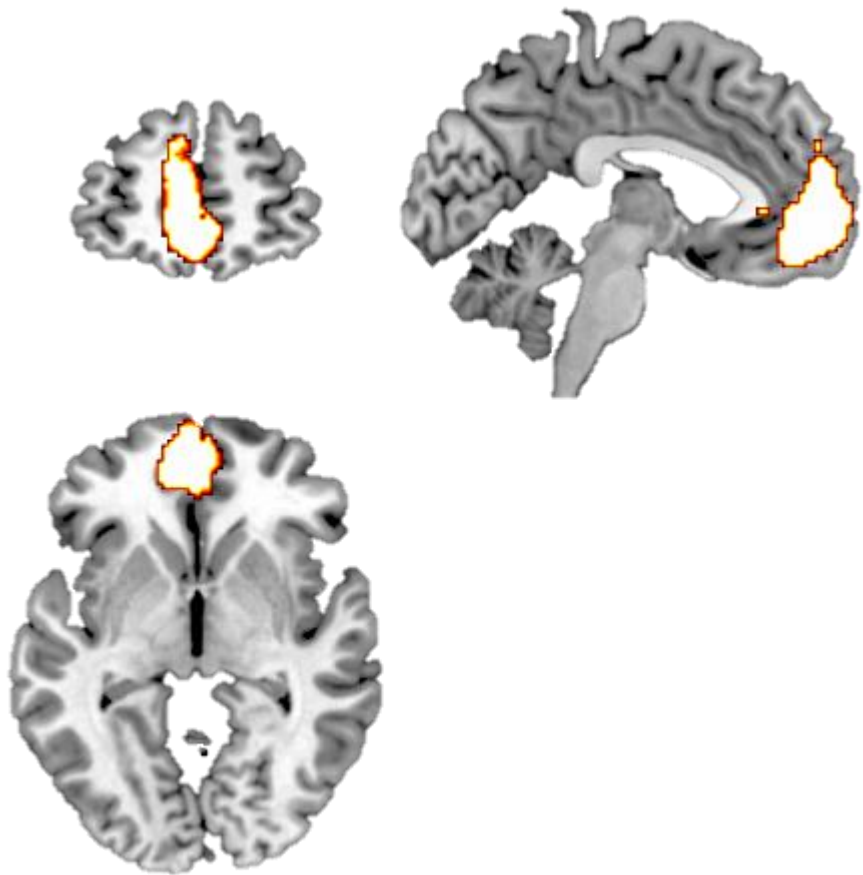

-4, 55, 3

NAcc

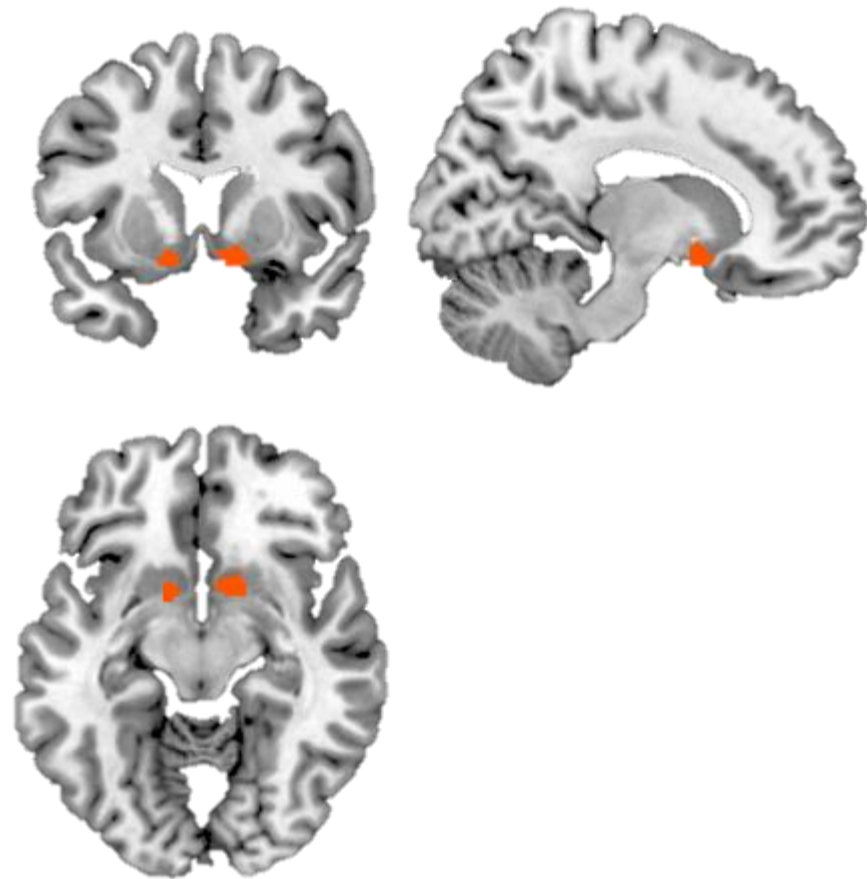

12, 10, -10
