# Supplementary material for: Corticostriatal White Matter Integrity and Dopamine D1 Receptor Availability Predict Age Differences in Prefrontal Value Signaling during Reward Learning
Source: PubMed Central journal article supplement (PMC7472214; doi:10.1093/cercor/bhaa104), 2020-06-02

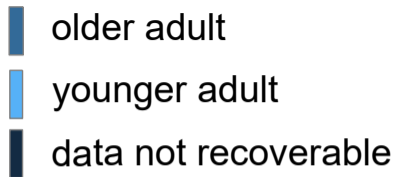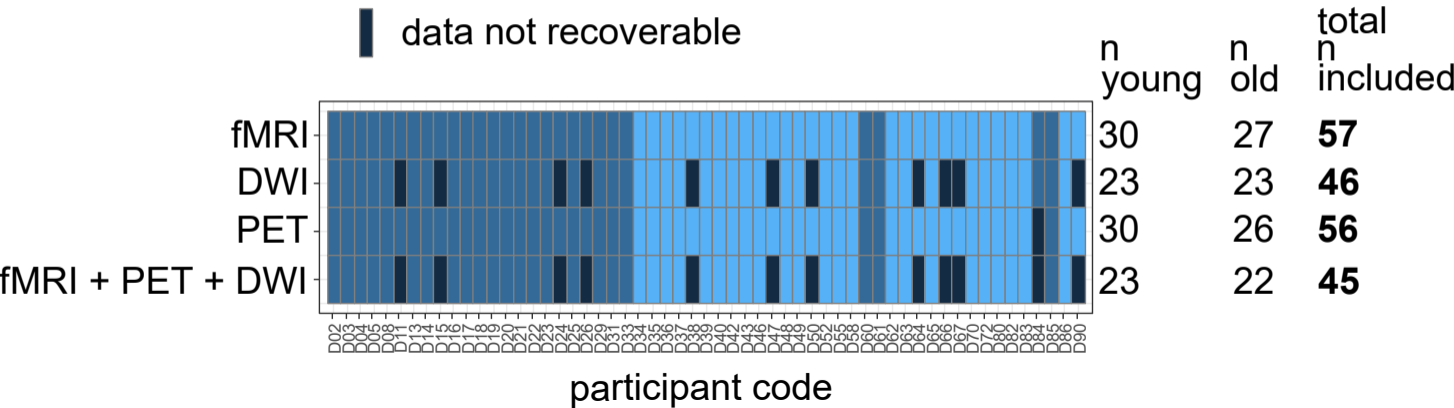

Supplement: suppfig2_bhaa104.pdf [file suppfig2_bhaa104.pdf]
